# Supplementary material for: The mass-specific energy cost of human walking is set by stature
Source: Oxford University Press journal article supplement (doi:10.1242/jeb.048199), 2010-11-12
Supplement: jeb048199tables1.pdf [file jeb048199tables1.pdf]

Table S1. Basal ( $E_{\text{metab-basal}}$ ) and gross ( $E_{\text{metab-gross}}$ ) metabolic walking rates included in the scaling analysis

| Subjects                        | $E_{\text{metab-basal}}$ (W kg <sup>-1</sup> ) | $E_{\text{metab-gross}}$ (W kg <sup>-1</sup> ) | $E_{\text{metab-basal}}/E_{\text{metab-gross}} \times 100$ (%) | Source                  |
|---------------------------------|------------------------------------------------|------------------------------------------------|----------------------------------------------------------------|-------------------------|
| Children; ages 5–7              | 2.18±0.12                                      | 5.14±0.27                                      | 43.0                                                           | Present study – group A |
| Children; ages 8–14             | 1.55±0.06                                      | 4.08±0.13                                      | 38.0                                                           | Present study – group B |
| Children and adults; ages 11–29 | 1.31±0.04                                      | 3.76±0.16                                      | 34.8                                                           | Present study – group C |
| Children and adults; ages 16–32 | 1.13±0.03                                      | 3.66±0.13                                      | 30.9                                                           | Present study – group D |
| Adults                          | 1.19                                           | 4.81                                           | 24.7                                                           | Bastien et al., 2005    |
| Obese adult males               | 0.95                                           | 3.04                                           | 31.3                                                           | Browning et al., 2006   |
| Obese adult females             | 0.85                                           | 3.05                                           | 27.9                                                           | Browning et al., 2006   |
| Non-obese adult males           | 1.17                                           | 3.06                                           | 38.5                                                           | Browning et al., 2006   |
| Non-obese adult females         | 1.13                                           | 3.21                                           | 35.3                                                           | Browning et al., 2006   |
| Adult males                     | 1.27                                           | 4.47                                           | 28.4                                                           | Cotes and Meade, 1960   |
| Children; ages 3–4              | 2.32                                           | 6.34                                           | 36.6                                                           | DeJaeger et al., 2001   |
| Children; ages 5–6              | 2.10                                           | 5.45                                           | 38.5                                                           | DeJaeger et al., 2001   |
| Children; ages 7–8              | 1.98                                           | 5.30                                           | 37.3                                                           | DeJaeger et al., 2001   |
| Children; ages 9–10             | 1.74                                           | 4.60                                           | 37.7                                                           | DeJaeger et al., 2001   |
| Children; ages 11–12            | 1.59                                           | 3.66                                           | 43.5                                                           | DeJaeger et al., 2001   |
| Adults                          | 1.17                                           | 3.84                                           | 30.6                                                           | DeJaeger et al., 2001   |
| Male children                   | 2.04                                           | 8.89                                           | 23.0                                                           | Freedson et al., 1981   |
| Obese children                  | 1.52                                           | 6.15                                           | 24.7                                                           | Maffeis et al., 1993    |
| Non-obese children              | 1.82                                           | 5.63                                           | 32.3                                                           | Maffeis et al., 1993    |
| Young active adults             | 1.15                                           | 3.65                                           | 31.6                                                           | Martin et al., 1992     |
| Young sedentary adults          | 1.14                                           | 3.74                                           | 30.6                                                           | Martin et al., 1992     |
| Adolescents                     | 1.28                                           | 4.51                                           | 28.4                                                           | McCann and Adams, 2002  |
| Adults                          | 1.06                                           | 4.36                                           | 24.3                                                           | McCann and Adams, 2002  |
| Adult males                     | 1.16                                           | 4.41                                           | 26.2                                                           | Mian et al., 2006       |
| Children; age 6                 | 2.12                                           | 5.23                                           | 40.6                                                           | Morgan et al., 2002     |
| Children; age 7                 | 1.84                                           | 4.86                                           | 37.9                                                           | Morgan et al., 2002     |
| Children; age 8                 | 1.61                                           | 3.99                                           | 40.3                                                           | Morgan et al., 2002     |
| Children; age 9                 | 1.40                                           | 4.42                                           | 31.6                                                           | Morgan et al., 2002     |
| Children; age 10                | 1.55                                           | 4.29                                           | 36.2                                                           | Morgan et al., 2002     |

Basal metabolic rates were calculated from age, height, mass and gender from equations of Schofield et al., 1985.

Age, stature, and mass ranges for the 48 original subjects were: 5 to 32 years, 1.07 to 1.83 meters, and 15.9 to 88.7 kg, respectively.
